# Supplementary material for: Molecular Diversity and Evolutionary Relatedness of Paulownia Witches’-Broom Phytoplasma in Different Geographical Distributions in China
Source: MDPI journal article supplement (doi:10.3390/biology11111611), 2022-11-03
Supplement: s1 [file s1]

## Supplementary material

Table S1. Paulownia witches'-broom phytoplasma strains source and gene sequencing information

| Site | Sample codes   | Source area        | Year | 16SrDNA  | <i>rp</i> | <i>fusA</i> | <i>secY</i> | <i>tuf</i> | <i>dnaK</i> | <i>secA</i> | <i>rpoB</i> | <i>pyrG</i> | <i>gyrB</i> | <i>ipt</i> |
|------|----------------|--------------------|------|----------|-----------|-------------|-------------|------------|-------------|-------------|-------------|-------------|-------------|------------|
| 1    | 1-PaWB-JSNJ8   | Nanjing, Jiangsu   | 2014 | OP107398 | OP124576  | OP124443    | OP124050    | OP123574   | OP124797    | OP124184    | OP124316    | -           | -           | -          |
| 2    | 11-PaWB-JSZJ   | Zhenjiang, Jiangsu | 2014 | OP107399 | OP124577  | OP124444    | OP124051    | OP123575   | OP124798    | OP124185    | OP124317    | OP125013    | -           | -          |
| 3    | 12-PaWB-AHHF   | Hefei, Anhui       | 2014 | OP107400 | OP124578  | OP124445    | OP124052    | OP123576   | OP124799    | OP124186    | OP124318    | -           | -           | -          |
| 4    | 28-PaWB-BJLKY2 | Beijing            | 2014 | OP107401 | OP124579  | OP124446    | OP124053    | OP123577   | OP124800    | OP124187    | OP124319    | -           | -           | -          |
| 5    | 30-PaWB-HNPY1  | Puyang, Henan      | 2014 | -        | OP124580  | OP124447    | OP124054    | OP123578   | OP124801    | OP124188    | OP124320    | OP125014    | -           | -          |
| 6    | 32-PaWB-HNZK   | Zhoukou, Henan     | 2014 | OP107462 | OP124581  | OP124448    | OP124055    | OP123579   | OP124802    | OP124189    | OP124321    | OP125015    | -           | OP124714   |
| 7    | 45-PaWB-HNPY2  | Puyang, Henan      | 2014 | OP107402 | OP124582  | OP124449    | OP124056    | OP123580   | OP124803    | OP124190    | OP124322    | OP125016    | -           | OP124715   |
| 8    | 46-PaWB-ZJTZ   | Taizhou, Zhejiang  | 2014 | OP107403 | OP124583  | OP124450    | OP124057    | OP123581   | OP124804    | OP124191    | OP124323    | OP125017    | OP124927    | OP124716   |
| 9    | 48-PaWB-JXJA   | Ji'an, Jiangxi     | 2014 | OP107404 | OP124584  | OP124451    | OP124058    | OP123582   | OP124805    | OP124192    | OP124324    | -           | -           | OP124717   |
| 10   | 51-PaWB-HBBD2  | Baoding, Hebei     | 2014 | OP107463 | OP124585  | OP124452    | OP124059    | OP123583   | OP124806    | OP124193    | OP124325    | OP125018    | OP124928    | OP124718   |
| 11   | 55-PaWB-SDJX   | Juxian, Shandong   | 2014 | OP107405 | OP124586  | OP124453    | OP124060    | OP123584   | OP124807    | OP124184    | OP124326    | OP125019    | -           | -          |
| 12   | 84-PaWB-FJMFS3 | Fuzhou, Fujian     | 2014 | OP107406 | OP124587  | OP124454    | OP124061    | OP123585   | OP124808    | -           | -           | -           | -           | -          |
| 13   | 86-PaWB-FJMFS5 | Fuzhou, Fujian     | 2014 | -        | OP124588  | -           | OP124062    | OP123586   | -           | -           | OP124327    | -           | -           | -          |
| 14   | 87-PaWB-FJMFS6 | Fuzhou, Fujian     | 2014 | -        | OP124589  | -           | -           | OP123587   | -           | -           | -           | -           | -           | -          |
| 15   | 89-PaWB-JXNC1  | Nanchang, Jiangxi  | 2014 | OP107407 | OP124590  | OP124455    | -           | OP123588   | OP124809    | -           | OP124328    | -           | -           | -          |
| 16   | 90-PaWB-JXNC2  | Nanchang, Jiangxi  | 2014 | -        | OP124591  | OP124456    | OP124063    | OP123589   | OP124810    | OP124194    | OP124329    | OP125020    | OP124929    | -          |
| 17   | 91-PaWB-HNCS1  | Changsha, Hunan    | 2014 | -        | OP124592  | OP124457    | OP124064    | OP123590   | -           | OP124195    | OP124330    | -           | -           | -          |
| 18   | 92-PaWB-HNCS2  | Changsha, Hunan    | 2014 | OP107408 | OP124593  | OP124458    | OP124065    | OP123591   | OP124811    | OP124196    | -           | -           | -           | -          |
| 19   | 95-PaWB-LNDL   | Dalian, Liaoning   | 2015 | OP107409 | OP124594  | OP124459    | OP124066    | OP123592   | OP124812    | OP124197    | OP124331    | OP125021    | OP124930    | OP124719   |
| 20   | 96-PaWB-HBBD1  | Baoding, Hebei     | 2015 | OP107410 | OP124595  | OP124460    | OP124067    | OP123593   | OP124813    | OP124198    | OP124332    | OP125022    | OP124931    | OP124720   |

| Site | Sample codes    | Source area      | Year | 16SrDNA  | <i>rp</i> | <i>fusA</i> | <i>secY</i> | <i>tuf</i> | <i>dnaK</i> | <i>secA</i> | <i>rpoB</i> | <i>pyrG</i> | <i>gyrB</i> | <i>ipt</i> |
|------|-----------------|------------------|------|----------|-----------|-------------|-------------|------------|-------------|-------------|-------------|-------------|-------------|------------|
| 21   | 97-PaWB-GZGY    | Guiyang, Guizhou | 2015 | OP107411 | OP124596  | OP124461    | OP124068    | OP123594   | OP124814    | OP124199    | OP124333    | OP125023    | OP124932    | OP124721   |
| 22   | 98-PaWB-HNKF    | Kaifeng, Henan   | 2015 | OP107412 | OP124576  | OP124462    | OP124069    | OP123595   | OP124815    | OP124200    | -           | OP125024    | OP124933    | OP124722   |
| 23   | 100-PaWB-JSNJ1  | Nanjing, Jiangsu | 2015 | OP107464 | -         | -           | -           | -          | -           | -           | -           | -           | -           | -          |
| 24   | 104-PaWB-JSNJ5  | Nanjing, Jiangsu | 2015 | OP107465 | OP124597  | OP124463    | OP124070    | OP123596   | OP124816    | OP124201    | OP124334    | OP125025    | -           | OP124723   |
| 25   | 105-PaWB-JSNJ6  | Nanjing, Jiangsu | 2015 | OP107413 | OP124598  | OP124464    | OP124071    | OP123597   | OP124817    | OP124202    | OP124335    | OP125026    | OP124934    | OP124724   |
| 26   | 107-PaWB-JSSZ2  | Suzhou, Jiangsu  | 2015 | OP107414 | OP124599  | OP124465    | OP124072    | OP123598   | OP124818    | OP124203    | OP124336    | OP125027    | OP124935    | OP124725   |
| 27   | 108-PaWB-JSSZ3  | Suzhou, Jiangsu  | 2015 | -        | OP124600  | OP124466    | -           | OP123599   | OP124819    | OP124204    | OP124337    | -           | -           | -          |
| 28   | 109-PaWB-JSSZ4  | Suzhou, Jiangsu  | 2015 | OP107415 | OP124601  | OP124467    | OP124073    | OP123600   | OP124820    | OP124205    | OP124338    | OP125028    | OP124936    | -          |
| 29   | 111-PaWB-JSSZ6  | Suzhou, Jiangsu  | 2015 | OP107416 | OP124602  | OP124468    | OP124074    | OP123601   | OP124821    | OP124206    | OP124339    | OP125029    | OP124937    | OP124726   |
| 30   | 118-PaWB-HNZZ1  | Zhengzhou, Henan | 2015 | OP107466 | OP124603  | OP124469    | OP124075    | OP123602   | OP124822    | OP124207    | OP124340    | OP125030    | -           | OP124727   |
| 31   | 119-PaWB-HNZZ4  | Zhengzhou, Henan | 2015 | OP107467 | OP124604  | OP124470    | OP124076    | OP123603   | -           | OP124208    | -           | OP125031    | -           | -          |
| 32   | 120-PaWB-HNLY2  | Luoyang, Henan   | 2015 | OP107417 | OP124605  | OP124471    | OP124077    | OP123604   | OP124823    | OP124209    | OP124341    | OP125032    | -           | -          |
| 33   | 121-PaWB-HNLY3  | Luoyang, Henan   | 2015 | OP107418 | -         | -           | -           | -          | -           | -           | -           | -           | -           | -          |
| 34   | 122-PaWB-HNLY4  | Luoyang, Henan   | 2015 | OP107468 | OP124606  | OP124472    | OP124078    | OP123605   | OP124824    | OP124210    | OP124342    | OP125033    | -           | OP124728   |
| 35   | 123-PaWB-SAXWN1 | Weinan, Shaanxi  | 2015 | OP107469 | OP124607  | OP124473    | OP124079    | OP123606   | OP124825    | OP124211    | OP124343    | -           | OP124938    | OP124729   |
| 36   | 124-PaWB-SAXWN2 | Weinan, Shaanxi  | 2015 | -        | OP124608  | OP124474    | -           | OP123607   | OP124826    | OP124212    | OP124344    | OP125034    | OP124939    | -          |
| 37   | 126-PaWB-SAXWN4 | Weinan, Shaanxi  | 2015 | OP107470 | OP124609  | OP124475    | OP124080    | OP123608   | OP124827    | OP124213    | -           | OP125035    | -           | OP124730   |
| 38   | 127-PaWB-SAXXA1 | Xi'an, Shaanxi   | 2015 | OP107419 | OP124610  | OP124476    | OP124081    | OP123609   | OP124828    | OP124214    | OP124345    | OP125036    | -           | -          |
| 39   | 128-PaWB-SAXXA2 | Xi'an, Shaanxi   | 2015 | OP107471 | OP124611  | OP124477    | OP124082    | OP123610   | OP124829    | OP124215    | OP124346    | OP125037    | OP124940    | OP124731   |
| 40   | 129-PaWB-SAXXA3 | Xi'an, Shaanxi   | 2015 | OP107420 | OP124612  | OP124478    | OP124083    | OP123611   | OP124830    | OP124216    | OP124347    | OP125038    | OP124941    | OP124732   |
| 41   | 130-PaWB-SAXXA4 | Xi'an, Shaanxi   | 2015 | OP107421 | OP124613  | OP124479    | OP124084    | OP123612   | OP124831    | OP124217    | OP124348    | OP125039    | -           | -          |
| 42   | 131-PaWB-SAXXA5 | Xi'an, Shaanxi   | 2015 | OP107472 | OP124614  | OP124480    | OP124085    | OP123613   | OP124832    | OP124218    | OP124349    | -           | -           | -          |
| 43   | 132-PaWB-SAXXA6 | Xi'an, Shaanxi   | 2015 | OP107422 | OP124615  | OP124481    | OP124086    | OP123614   | OP124833    | OP124219    | OP124350    | OP125040    | OP124942    | -          |
| 44   | 133-PaWB-SXTY1  | Taiyuan, Shanxi  | 2015 | OP107423 | OP124616  | OP124482    | OP124087    | OP123615   | OP124834    | OP124220    | OP124351    | OP125041    | OP124943    | OP124733   |

| Site | Sample codes   | Source area       | Year | 16SrDNA  | <i>rp</i> | <i>fusA</i> | <i>secY</i> | <i>tuf</i> | <i>dnaK</i> | <i>secA</i> | <i>rpoB</i> | <i>pyrG</i> | <i>gyrB</i> | <i>ipt</i> |
|------|----------------|-------------------|------|----------|-----------|-------------|-------------|------------|-------------|-------------|-------------|-------------|-------------|------------|
| 45   | 134-PaWB-SXTY3 | Taiyuan, Shanxi   | 2015 | OP107424 | OP124617  | OP124483    | OP124088    | OP123616   | OP124835    | OP124221    | OP124352    | OP125042    | OP124944    | -          |
| 46   | 135-PaWB-SXTY5 | Taiyuan, Shanxi   | 2015 | OP107425 | OP124618  | OP124484    | OP124089    | OP123617   | OP124836    | OP124222    | OP124353    | OP125043    | OP124945    | OP124734   |
| 47   | 136-PaWB-SXTY6 | Taiyuan, Shanxi   | 2015 | OP107426 | OP124619  | OP124485    | OP124090    | OP123618   | OP124837    | OP124223    | OP124354    | OP125044    | -           | -          |
| 48   | 137-PaWB-SXTY7 | Taiyuan, Shanxi   | 2015 | OP107427 | OP124620  | OP124486    | OP124091    | OP123619   | OP124838    | OP124224    | OP124355    | OP125045    | -           | OP124735   |
| 49   | 138-PaWB-SXTY8 | Taiyuan, Shanxi   | 2015 | OP107428 | OP124621  | OP124487    | OP124092    | OP123620   | OP124839    | OP124225    | OP124356    | OP125046    | -           | OP124736   |
| 50   | 139-PaWB-SXTY9 | Taiyuan, Shanxi   | 2015 | OP107473 | OP124622  | OP124488    | OP124093    | OP123621   | OP124840    | OP124226    | OP124357    | OP125047    | OP124946    | OP124737   |
| 51   | 140-PaWB-HBJM1 | Jinmen, Hubei     | 2015 | OP107474 | OP124623  | OP124489    | OP124094    | OP123622   | OP124841    | OP124227    | OP124358    | OP125048    | -           | -          |
| 52   | 141-PaWB-HBJM2 | Jinmen, Hubei     | 2015 | OP107429 | OP124624  | OP124490    | OP124095    | OP123623   | OP124842    | OP124228    | OP124359    | OP125049    | -           | -          |
| 53   | 142-PaWB-HBJM3 | Jinmen, Hubei     | 2015 | OP107430 | OP124625  | -           | OP124096    | OP123624   | OP124843    | OP124229    | OP124360    | OP125050    | OP124947    | OP124738   |
| 54   | 144-PaWB-AHBZ2 | Bozhou, Anhui     | 2015 | OP107475 | OP124626  | OP124491    | OP124097    | OP123625   | OP124844    | OP124230    | OP124361    | OP125051    | OP124948    | -          |
| 55   | 145-PaWB-AHBZ3 | Bozhou, Anhui     | 2015 | OP107431 | OP124627  | OP124492    | OP124098    | OP123626   | OP124845    | OP124231    | OP124362    | OP125052    | OP124949    | OP124739   |
| 56   | 147-PaWB-SAXYA | Yan'an, Shaanxi   | 2015 | OP107476 | OP124628  | OP124493    | OP124099    | OP123627   | OP124846    | OP124232    | OP124363    | -           | -           | -          |
| 57   | 192-PaWB-FJFZ1 | Fuzhou, Fujian    | 2015 | OP107432 | OP124629  | OP124494    | -           | -          | OP124847    | OP124233    | -           | -           | -           | -          |
| 58   | 194-PaWB-FJFZ3 | Fuzhou, Fujian    | 2015 | OP107477 | OP124630  | OP124495    | OP124100    | OP123628   | OP124848    | OP124234    | OP124364    | OP125053    | -           | -          |
| 59   | 195-PaWB-FJFZ4 | Fuzhou, Fujian    | 2015 | OP107433 | OP124631  | OP124496    | OP124101    | OP123629   | OP124849    | OP124235    | OP124365    | OP125054    | OP124950    | OP124740   |
| 60   | 238-PaWB-HBLS1 | Lingshou, Hebei   | 2015 | OP107478 | OP124632  | OP124497    | OP124102    | OP123630   | OP124850    | OP124236    | OP124366    | OP125055    | OP124951    | -          |
| 61   | 239-PaWB-HBLS2 | Lingshou, Hebei   | 2015 | OP107434 | OP124633  | OP124498    | OP124103    | OP123631   | OP124851    | OP124237    | OP124367    | OP125056    | OP124952    | OP124741   |
| 62   | 240-PaWB-HBLS3 | Lingshou, Hebei   | 2015 | OP107435 | OP124634  | OP124499    | OP124104    | OP123632   | OP124852    | OP124238    | OP124368    | OP125057    | OP124953    | OP124742   |
| 63   | 246-PaWB-SDJN1 | Jinan, Shandong   | 2015 | OP107436 | OP124635  | OP124500    | OP124105    | OP123633   | OP124853    | OP124239    | OP124369    | OP125058    | OP124954    | OP124743   |
| 64   | 247-PaWB-SDJN2 | Jinan, Shandong   | 2015 | OP107479 | OP124636  | OP124501    | OP124106    | OP123634   | OP124854    | OP124240    | OP124370    | OP125059    | OP124955    | -          |
| 65   | 249-PaWB-SDJN4 | Jinan, Shandong   | 2015 | OP107437 | OP124637  | OP124502    | OP124107    | OP123635   | OP124855    | OP124241    | OP124371    | OP125060    | OP124956    | OP124744   |
| 66   | 250-PaWB-ZJWZ1 | Wenzhou, Zhejiang | 2015 | OP107480 | OP124638  | OP124503    | OP124108    | OP123636   | OP124856    | OP124242    | OP124372    | OP125061    | OP124957    | OP124745   |
| 67   | 251-PaWB-ZJWZ2 | Wenzhou, Zhejiang | 2015 | OP107438 | -         | OP124504    | OP124109    | OP123637   | OP124857    | -           | OP124373    | -           | OP124958    | OP124746   |
| 68   | 252-PaWB-ZJWZ3 | Wenzhou, Zhejiang | 2015 | OP107439 | OP124639  | OP124505    | OP124110    | OP123638   | OP124858    | OP124243    | OP124374    | OP125062    | OP124959    | OP124747   |

| Site | Sample codes   | Source area        | Year | 16SrDNA  | <i>rp</i> | <i>fusA</i> | <i>secY</i> | <i>tuf</i> | <i>dnaK</i> | <i>secA</i> | <i>rpoB</i> | <i>pyrG</i> | <i>gyrB</i> | <i>ipt</i> |
|------|----------------|--------------------|------|----------|-----------|-------------|-------------|------------|-------------|-------------|-------------|-------------|-------------|------------|
| 69   | 254-PaWB-ZJWZ5 | Wenzhou, Zhejiang  | 2015 | OP107440 | OP124640  | OP124506    | OP124111    | OP123639   | OP124859    | OP124244    | OP124375    | OP125063    | OP124960    | OP124748   |
| 70   | 255-PaWB-ZJLS1 | Lishui, Zhejiang   | 2015 | OP107441 | OP124641  | OP124507    | OP124112    | OP123640   | OP124860    | OP124245    | -           | -           | -           | OP124749   |
| 71   | 256-PaWB-ZJLS2 | Lishui, Zhejiang   | 2015 | OP107442 | OP124642  | OP124508    | OP124113    | OP123641   | OP124861    | OP124246    | OP124376    | OP125064    | OP124961    | OP124750   |
| 72   | 257-PaWB-ZJLS3 | Lishui, Zhejiang   | 2015 | OP107443 | OP124643  | OP124509    | OP124114    | OP123642   | OP124862    | OP124247    | OP124377    | OP125065    | OP124962    | OP124751   |
| 73   | 259-PaWB-ZJLS5 | Lishui, Zhejiang   | 2015 | OP107481 | OP124644  | OP124510    | OP124115    | OP123643   | OP124863    | OP124248    | OP124378    | -           | -           | -          |
| 74   | 260-PaWB-ZJLS6 | Lishui, Zhejiang   | 2015 | OP107444 | OP124645  | OP124511    | OP124116    | OP123644   | OP124864    | OP124249    | OP124379    | OP125066    | OP124963    | OP124752   |
| 75   | 262-PaWB-ZJJH1 | Jinhua, Zhejiang   | 2015 | OP107445 | OP124646  | OP124512    | OP124117    | OP123645   | OP124865    | OP124250    | OP124380    | -           | OP124964    | OP124753   |
| 76   | 263-PaWB-ZJJH2 | Jinhua, Zhejiang   | 2015 | OP107446 | OP124647  | OP124513    | OP124118    | OP123646   | OP124866    | OP124251    | OP124381    | OP125067    | OP124965    | OP124754   |
| 77   | 264-PaWB-ZJJH3 | Jinhua, Zhejiang   | 2015 | -        | OP124648  | OP124514    | OP124119    | OP123647   | OP124867    | OP124252    | OP124382    | OP125068    | -           | OP124755   |
| 78   | 265-PaWB-ZJJH4 | Jinhua, Zhejiang   | 2015 | OP107447 | OP124649  | OP124515    | -           | -          | OP124868    | OP124253    | -           | -           | -           | -          |
| 79   | 266-PaWB-ZJJH5 | Jinhua, Zhejiang   | 2015 | OP107448 | OP124650  | OP124516    | OP124120    | OP123648   | OP124869    | OP124254    | OP124383    | OP125069    | OP124966    | OP124756   |
| 80   | 268-PaWB-ZJJH7 | Jinhua, Zhejiang   | 2015 | OP107482 | OP124651  | -           | OP124121    | OP123649   | OP124870    | OP124255    | OP124384    | OP125070    | OP124967    | -          |
| 81   | 272-PaWB-ZJHZ1 | Hangzhou, Zhejiang | 2015 | OP107449 | OP124652  | OP124517    | OP124122    | OP123650   | OP124871    | OP124256    | OP124385    | OP125071    | -           | OP124757   |
| 82   | 273-PaWB-ZJHZ2 | Hangzhou, Zhejiang | 2015 | OP107450 | OP124653  | OP124518    | OP124123    | OP123651   | OP124872    | OP124257    | OP124386    | OP125072    | OP124968    | OP124758   |
| 83   | 274-PaWB-ZJHZ3 | Hangzhou, Zhejiang | 2015 | OP107451 | OP124654  | OP124519    | OP124124    | OP123652   | OP124873    | OP124258    | OP124387    | OP125073    | OP124969    | -          |
| 84   | 275-PaWB-ZJHZ4 | Hangzhou, Zhejiang | 2015 | OP107483 | OP124655  | OP124520    | OP124125    | OP123653   | OP124874    | OP124259    | OP124388    | OP125074    | OP124970    | OP124759   |
| 85   | 276-PaWB-ZJHZ5 | Hangzhou, Zhejiang | 2015 | OP107484 | OP124656  | OP124521    | OP124126    | OP123654   | OP124875    | OP124260    | OP124389    | OP125075    | OP124971    | -          |
| 86   | 277-PaWB-ZJHZ6 | Hangzhou, Zhejiang | 2015 | OP107485 | OP124657  | OP124522    | OP124127    | OP123655   | OP124876    | OP124261    | OP124390    | OP125076    | OP124972    | OP124760   |
| 87   | 278-PaWB-ZJHZ7 | Hangzhou, Zhejiang | 2015 | OP107486 | OP124658  | OP124523    | OP124128    | OP123656   | OP124877    | -           | OP124391    | -           | -           | -          |
| 88   | 279-PaWB-ZJCA1 | Chun'an, Zhejiang  | 2015 | OP107487 | OP124659  | OP124524    | OP124129    | OP123657   | OP124878    | OP124262    | -           | OP125077    | OP124973    | OP124761   |
| 89   | 280-PaWB-ZJCA2 | Chun'an, Zhejiang  | 2015 | OP107488 | OP124660  | OP124525    | OP124130    | OP123658   | OP124879    | OP124263    | OP124392    | OP125078    | -           | OP124762   |
| 90   | 281-PaWB-ZJCA3 | Chun'an, Zhejiang  | 2015 | OP107489 | OP124661  | OP124526    | OP124131    | OP123659   | OP124880    | OP124264    | OP124393    | OP125079    | OP124974    | OP124763   |
| 91   | 282-PaWB-ZJCA4 | Chun'an, Zhejiang  | 2015 | OP107452 | OP124662  | OP124527    | OP124132    | OP123660   | OP124881    | OP124265    | OP124394    | -           | -           | OP124764   |
| 92   | 283-PaWB-ZJCA5 | Chun'an, Zhejiang  | 2015 | OP107453 | OP124663  | OP124528    | OP124133    | OP123661   | OP124882    | OP124266    | OP124395    | OP125080    | -           | -          |

| Site | Sample codes     | Source area       | Year | 16SrDNA  | <i>rp</i> | <i>fusA</i> | <i>secY</i> | <i>tuf</i> | <i>dnaK</i> | <i>secA</i> | <i>rpoB</i> | <i>pyrG</i> | <i>gyrB</i> | <i>ipt</i> |
|------|------------------|-------------------|------|----------|-----------|-------------|-------------|------------|-------------|-------------|-------------|-------------|-------------|------------|
| 93   | 284-PaWB-ZJCA6   | Chun'an, Zhejiang | 2015 | OP107490 | OP124664  | OP124529    | OP124134    | OP123662   | OP124883    | OP124267    | OP124396    | OP125081    | OP124975    | OP124765   |
| 94   | 285-PaWB-ZJCA7   | Chun'an, Zhejiang | 2015 | -        | OP124665  | OP124530    | OP124135    | OP123663   | OP124884    | OP124268    | OP124397    | -           | OP124976    | OP124766   |
| 95   | 286-PaWB-ZJCA8   | Chun'an, Zhejiang | 2015 | -        | OP124666  | OP124531    | OP124136    | OP123664   | OP124885    | OP124269    | OP124398    | -           | OP124977    | OP124767   |
| 96   | 289-PaWB-HBTX4   | Tangxian, Hebei   | 2015 | -        | OP124667  | OP124532    | OP124137    | OP123665   | OP124886    | OP124270    | OP124399    | -           | OP124978    | -          |
| 97   | 290-PaWB-HBTX3   | Tangxian, Hebei   | 2015 | OP107454 | OP124668  | OP124533    | OP124138    | OP123666   | OP124887    | OP124271    | OP124400    | OP125082    | OP124979    | OP124768   |
| 98   | 291-PaWB-HBTX2   | Tangxian, Hebei   | 2015 | OP107491 | OP124669  | OP124534    | OP124139    | OP123667   | -           | OP124272    | OP124401    | OP125083    | OP124980    | OP124769   |
| 99   | 292-PaWB-HBTX1   | Tangxian, Hebei   | 2015 | OP107492 | OP124670  | OP124535    | OP124140    | OP123668   | OP124888    | OP124273    | OP124402    | OP125084    | OP124981    | OP124770   |
| 100  | 297-PaWB-BJ3     | Beijing           | 2015 | OP107493 | OP124671  | OP124536    | OP124141    | OP123669   | OP124889    | OP124274    | OP124403    | -           | OP124982    | OP124771   |
| 101  | 298-PaWB-BJ4     | Beijing           | 2015 | OP107494 | OP124672  | OP124537    | OP124142    | OP123670   | OP124890    | OP124275    | OP124404    | OP125085    | OP124983    | OP124772   |
| 102  | 299-PaWB-BJ5     | Beijing           | 2015 | OP107455 | OP124673  | OP124538    | OP124143    | OP123671   | OP124891    | OP124276    | OP124405    | OP125086    | OP124984    | OP124773   |
| 103  | 300-PaWB-BJ6     | Beijing           | 2015 | OP107456 | OP124674  | OP124539    | OP124144    | OP123672   | OP124892    | OP124277    | OP124406    | OP125087    | OP124985    | -          |
| 104  | 301-PaWB-BJ7     | Beijing           | 2015 | OP107495 | OP124675  | OP124540    | OP124145    | OP123673   | OP124893    | OP124278    | OP124407    | OP125088    | OP124986    | OP124774   |
| 105  | 302-PaWB-BJ8     | Beijing           | 2015 | OP107457 | OP124676  | OP124541    | OP124146    | OP123674   | OP124894    | OP124279    | OP124408    | -           | OP124987    | OP124775   |
| 106  | 303-PaWB-BJ1     | Beijing           | 2015 | -        | OP124677  | OP124542    | OP124147    | OP123675   | OP124895    | OP124280    | OP124409    | OP125089    | OP124988    | -          |
| 107  | 359-PaWB-CQ7     | Chongqing         | 2015 | OP107496 | OP124678  | OP124543    | OP124148    | OP123676   | OP124896    | OP124281    | OP124410    | -           | OP124989    | -          |
| 108  | 373-PaWB-SCCD3   | Chengdu, Sichuan  | 2015 | OP107497 | OP124679  | OP124544    | OP124149    | OP123677   | OP124897    | OP124282    | OP124411    | OP125090    | -           | -          |
| 109  | 374-PaWB-SCCD4   | Chengdu, Sichuan  | 2015 | OP107498 | OP124680  | OP124545    | OP124150    | OP123678   | OP124898    | OP124283    | OP124412    | OP125091    | OP124990    | -          |
| 110  | 375-PaWB-SCLS1   | Leshan, Sichuan   | 2015 | OP107458 | OP124681  | OP124546    | OP124151    | OP123679   | OP124899    | OP124284    | OP124413    | OP125092    | -           | -          |
| 111  | 376-PaWB-SCLS2   | Leshan, Sichuan   | 2015 | OP107499 | OP124682  | OP124547    | OP124152    | OP123680   | OP124900    | OP124285    | OP124414    | OP125093    | -           | OP124776   |
| 112  | 377-PaWB-CQ1     | Chongqing         | 2015 | OP107459 | OP124683  | OP124548    | OP124153    | OP123681   | OP124901    | OP124286    | OP124415    | -           | -           | -          |
| 113  | 381-PaWB-CQ2     | Chongqing         | 2015 | OP107500 | OP124684  | OP124549    | OP124154    | OP123682   | OP124902    | OP124287    | OP124416    | OP125094    | OP124991    | -          |
| 114  | 383-PaWB-CQ4     | Chongqing         | 2015 | OP107460 | OP124685  | OP124550    | OP124155    | -          | OP124903    | OP124288    | OP124417    | -           | OP124992    | -          |
| 115  | 403-PaWB-SCCD1-2 | Chengdu, Sichuan  | 2015 | OP107461 | OP124686  | OP124551    | OP124156    | OP123683   | OP124904    | OP124289    | OP124418    | OP125095    | OP124993    | OP124777   |
| 116  | 407-PaWB-HBGG1   | Wuhan, Hubei      | 2016 | -        | OP124689  | -           | OP124157    | -          | -           | OP124290    | OP124419    | -           | OP124994    | -          |

| Site | Sample codes     | Source area        | Year | 16SrDNA  | <i>rp</i> | <i>fusA</i> | <i>secY</i> | <i>tuf</i> | <i>dnaK</i> | <i>secA</i> | <i>rpoB</i> | <i>pyrG</i> | <i>gyrB</i> | <i>ipt</i> |
|------|------------------|--------------------|------|----------|-----------|-------------|-------------|------------|-------------|-------------|-------------|-------------|-------------|------------|
| 117  | 408-PaWB-HBGG2   | Wuhan, Hubei       | 2016 | -        | OP124688  | OP124553    | OP124158    | OP123684   | -           | OP124291    | OP124420    | -           | -           | -          |
| 118  | 409-PaWB-JXGF1   | Guangfeng, Jiangxi | 2016 | -        | OP124687  | OP124552    | OP124159    | -          | -           | -           | -           | -           | -           | -          |
| 119  | 410-PaWB-FJFZ73  | Fuzhou, Fujian     | 2019 | OP107501 | OP124690  | OP124554    | OP124160    | OP123685   | OP124905    | OP124292    | OP124421    | OP125096    | OP124995    | OP124778   |
| 120  | 411-PaWB-FJFZ79  | Fuzhou, Fujian     | 2019 | OP107502 | OP124691  | OP124555    | OP124161    | OP123686   | OP124906    | OP124293    | OP124422    | OP125097    | OP124996    | OP124779   |
| 121  | 412-PaWB-FJFZ80  | Fuzhou, Fujian     | 2019 | OP107503 | OP124692  | OP124556    | OP124162    | OP123687   | OP124907    | OP124294    | OP124423    | OP125098    | OP124997    | OP124780   |
| 122  | 413-PaWB-FJFZ81  | Fuzhou, Fujian     | 2019 | OP107504 | OP124693  | OP124557    | OP124163    | OP123688   | OP124908    | OP124295    | OP124424    | OP125099    | OP124998    | OP124781   |
| 123  | 414-PaWB-FJFZ84  | Fuzhou, Fujian     | 2019 | OP107505 | OP124694  | OP124558    | OP124164    | OP123689   | OP124909    | OP124296    | OP124425    | OP125100    | OP124999    | OP124782   |
| 124  | 415-PaWB-FJFZ85  | Fuzhou, Fujian     | 2019 | -        | OP124695  | OP124559    | OP124165    | OP123690   | OP124910    | OP124297    | OP124426    | OP125101    | -           | OP124783   |
| 125  | 416-PaWB-FJFZ86  | Fuzhou, Fujian     | 2019 | -        | OP124696  | OP124560    | OP124166    | OP123691   | OP124911    | OP124298    | OP124427    | OP125102    | -           | OP124784   |
| 126  | 417-PaWB-FJNP89  | Nanping, Fujian    | 2019 | OP107506 | OP124697  | OP124561    | OP124167    | OP123692   | OP124912    | OP124299    | OP124428    | OP125103    | OP125000    | OP124785   |
| 127  | 418-PaWB-FJNP95  | Nanping, Fujian    | 2019 | OP107507 | OP124698  | OP124562    | OP124168    | OP123693   | OP124913    | OP124300    | OP124429    | OP125104    | OP125001    | OP124786   |
| 128  | 420-PaWB-SCCD5a  | Chengdu, Sichuan   | 2019 | OP107508 | OP124699  | OP124563    | OP124169    | OP123694   | OP124914    | OP124301    | OP124430    | OP125105    | OP125002    | OP124787   |
| 129  | 421-PaWB-GZGY1   | Guiyang, Guizhou   | 2019 | OP107509 | OP124700  | OP124564    | OP124170    | OP123695   | OP124915    | OP124302    | OP124431    | OP125106    | OP125003    | OP124788   |
| 130  | 422-PaWB-GZGY2   | Guiyang, Guizhou   | 2019 | OP107510 | OP124701  | OP124565    | OP124171    | OP123696   | OP124916    | OP124303    | OP124432    | OP125107    | OP125004    | OP124789   |
| 131  | 423-PaWB-GZGY3   | Guiyang, Guizhou   | 2019 | OP107511 | OP124702  | OP124566    | OP124172    | OP123697   | OP124917    | OP124304    | OP124433    | OP125108    | OP125005    | OP124790   |
| 132  | 424-PaWB-GZZY2   | Zunyi, Guizhou     | 2019 | OP107512 | OP124703  | OP124567    | OP124173    | OP123698   | OP124918    | OP124305    | OP124434    | OP125109    | OP125006    | OP124791   |
| 133  | 425-PaWB-GZZY3   | Zunyi, Guizhou     | 2019 | OP107513 | OP124704  | OP124568    | OP124174    | OP123699   | OP124919    | OP124306    | OP124435    | OP125110    | OP125007    | OP124792   |
| 134  | 426-PaWB-YNKMd   | Kunming, Yunnan    | 2019 | OP107514 | OP124705  | OP124569    | OP124175    | OP123700   | OP124920    | OP124307    | OP124436    | OP125111    | OP125008    | OP124793   |
| 135  | 427-PaWB-YNKM2   | Kunming, Yunnan    | 2019 | OP107515 | OP124706  | OP124570    | OP124176    | OP123701   | OP124921    | OP124308    | OP124437    | OP125112    | OP125009    | OP124794   |
| 136  | 428-PaWB-YNKM3   | Kunming, Yunnan    | 2019 | OP107516 | OP124707  | OP124571    | OP124177    | OP123702   | OP124922    | OP124309    | OP124438    | OP125113    | OP125010    | OP124795   |
| 137  | 429-PaWB-YNKM4   | Kunming, Yunnan    | 2019 | OP107517 | OP124708  | OP124572    | OP124178    | OP123703   | OP124923    | OP124310    | OP124439    | OP125114    | OP125011    | OP124796   |
| 138  | 430-PaWB-JXGF    | Guangfeng, Jiangxi | 2019 | OP107518 | OP124709  | OP124573    | OP124179    | OP123704   | OP124924    | OP124311    | OP124440    | OP125115    | -           | -          |
| 139  | 431-PaWB-JXGFhf  | Guangfeng, Jiangxi | 2019 | -        | OP124710  | OP124574    | OP124180    | OP123705   | OP124925    | OP124312    | OP124441    | OP125116    | -           | -          |
| 140  | 432-PaWB-JXFY1   | Fenyi, Jiangxi     | 2019 | OP107519 | OP124711  | OP124575    | OP124181    | OP123706   | OP124926    | OP124313    | OP124442    | OP125117    | OP125012    | -          |
| 141  | 433-PaWB-SAXWN34 | Weinan, Shaanxi    | 2018 | -        | OP124712  | -           | OP124182    | -          | -           | OP124314    | -           | -           | -           | -          |

| Site | Sample codes     | Source area    | Year | 16SrDNA | <i>rp</i> | <i>fusA</i> | <i>secY</i> | <i>tuf</i> | <i>dnaK</i> | <i>secA</i> | <i>rpoB</i> | <i>pyrG</i> | <i>gyrB</i> | <i>ipt</i> |
|------|------------------|----------------|------|---------|-----------|-------------|-------------|------------|-------------|-------------|-------------|-------------|-------------|------------|
| 142  | 434-PaWB-SAXXA40 | Xi'an, Shaanxi | 2018 | -       | OP124713  | -           | OP124183    | -          | -           | OP124315    | -           | -           | -           | -          |

Note: “-” means didn’t have sequences

Table S2. Allelic profiles and STs based on combination of the 7 housekeeping genes of 105 PaWB strains

| STs  | No. of strains | Housekeeping gene haplotype |                   |                 |                   |                   |                   |                  | Allelic profiles |
|------|----------------|-----------------------------|-------------------|-----------------|-------------------|-------------------|-------------------|------------------|------------------|
|      |                | H <sub>dnaK</sub>           | H <sub>fusA</sub> | H <sub>rp</sub> | H <sub>rpoB</sub> | H <sub>secA</sub> | H <sub>secY</sub> | H <sub>tuf</sub> |                  |
| ST1  | 76             | 1                           | 1                 | 1               | 1                 | 1                 | 1                 | 1                | 1-1-1-1-1-1-1    |
| ST2  | 1              | 1                           | 1                 | 1               | 1                 | 1                 | 4                 | 1                | 1-1-1-1-1-4-1    |
| ST3  | 1              | 2                           | 2                 | 2               | 5                 | 1                 | 2                 | 2                | 2-2-2-5-1-2-2    |
| ST4  | 3              | 1                           | 1                 | 1               | 1                 | 2                 | 1                 | 1                | 1-1-1-1-2-1-1    |
| ST5  | 1              | 1                           | 1                 | 1               | 6                 | 2                 | 1                 | 1                | 1-1-1-6-2-1-1    |
| ST6  | 1              | 1                           | 1                 | 1               | 1                 | 1                 | 5                 | 1                | 1-1-1-1-1-5-1    |
| ST7  | 1              | 5                           | 1                 | 1               | 1                 | 1                 | 1                 | 1                | 5-1-1-1-1-1-1    |
| ST8  | 1              | 1                           | 1                 | 1               | 7                 | 1                 | 5                 | 1                | 1-1-1-7-1-5-1    |
| ST9  | 1              | 2                           | 2                 | 2               | 8                 | 1                 | 6                 | 2                | 2-2-2-8-1-6-2    |
| ST10 | 1              | 2                           | 2                 | 2               | 3                 | 1                 | 2                 | 2                | 2-2-2-3-1-2-2    |
| ST11 | 1              | 1                           | 1                 | 1               | 1                 | 1                 | 1                 | 3                | 1-1-1-1-1-1-3    |
| ST12 | 1              | 1                           | 1                 | 1               | 1                 | 3                 | 1                 | 1                | 1-1-1-1-3-1-1    |
| ST13 | 1              | 1                           | 1                 | 1               | 1                 | 1                 | 7                 | 1                | 1-1-1-1-1-7-1    |
| ST14 | 1              | 1                           | 3                 | 1               | 1                 | 1                 | 1                 | 1                | 1-3-1-1-1-1-1    |
| ST15 | 1              | 1                           | 1                 | 1               | 1                 | 1                 | 1                 | 4                | 1-1-1-1-1-1-4    |
| ST16 | 1              | 3                           | 1                 | 1               | 1                 | 1                 | 1                 | 1                | 3-1-1-1-1-1-1    |
| ST17 | 1              | 1                           | 1                 | 1               | 2                 | 1                 | 1                 | 1                | 1-1-1-2-1-1-1    |
| ST18 | 1              | 1                           | 1                 | 1               | 1                 | 1                 | 3                 | 1                | 1-1-1-1-1-3-1    |
| ST19 | 7              | 2                           | 2                 | 1               | 3                 | 2                 | 2                 | 2                | 2-2-1-3-2-2-2    |
| ST20 | 1              | 2                           | 2                 | 1               | 10                | 2                 | 2                 | 2                | 2-2-1-10-2-2-2   |
| ST21 | 1              | 2                           | 2                 | 2               | 5                 | 2                 | 2                 | 5                | 2-2-2-5-2-2-5    |
| ST22 | 1              | 2                           | 2                 | 1               | 11                | 2                 | 2                 | 2                | 2-2-1-11-2-2-2   |



Table S3. Information of all reference phytoplasma strains employed in the study

[illegible]

Table S4. polymorphic nucleotide sites of 16S rRNA gene

| 16S rRNA (no. of strains)  | Polymorphic Nucleotide Sites |    |    |     |     |     |     |     |     |     |
|----------------------------|------------------------------|----|----|-----|-----|-----|-----|-----|-----|-----|
|                            | 63                           | 82 | 86 | 118 | 212 | 300 | 450 | 559 | 685 | 724 |
| H <sub>16S</sub> rRNA1(37) | A                            | G  | A  | A   | G   | G   | A   | G   | G   | C   |
| H <sub>16S</sub> rRNA2(22) | •                            | •  | •  | •   | •   | •   | G   | •   | T   | •   |
| H <sub>16S</sub> rRNA3(19) | •                            | •  | •  | •   | •   | •   | G   | •   | •   | •   |
| H <sub>16S</sub> rRNA4(12) | •                            | •  | •  | •   | •   | •   | •   | •   | T   | •   |
| H <sub>16S</sub> rRNA5(8)  | •                            | •  | G  | •   | •   | A   | •   | •   | •   | •   |
| H <sub>16S</sub> rRNA6(8)  | •                            | T  | •  | •   | •   | •   | •   | •   | •   | •   |
| H <sub>16S</sub> rRNA7(5)  | •                            | T  | •  | •   | •   | •   | •   | •   | T   | •   |
| H <sub>16S</sub> rRNA8(2)  | •                            | •  | •  | •   | •   | A   | •   | •   | •   | •   |
| H <sub>16S</sub> rRNA9(1)  | •                            | •  | •  | •   | •   | A   | •   | •   | T   | •   |
| H <sub>16S</sub> rRNA10(1) | •                            | •  | •  | •   | •   | A   | G   | •   | •   | •   |
| H <sub>16S</sub> rRNA11(1) | •                            | •  | •  | •   | •   | •   | •   | •   | T   | T   |
| H <sub>16S</sub> rRNA12(1) | •                            | •  | •  | G   | •   | •   | G   | •   | T   | •   |
| H <sub>16S</sub> rRNA13(1) | •                            | •  | G  | •   | •   | A   | •   | T   | •   | •   |
| H <sub>16S</sub> rRNA14(1) | •                            | •  | G  | •   | •   | •   | G   | •   | •   | •   |
| H <sub>16S</sub> rRNA15(1) | •                            | •  | G  | •   | T   | A   | •   | •   | •   | •   |
| H <sub>16S</sub> rRNA16(1) | G                            | •  | •  | •   | •   | •   | G   | •   | •   | •   |
| H <sub>16S</sub> rRNA17(1) | •                            | •  | G  | •   | •   | A   | G   | •   | T   | •   |

Additional mutations that were found in regions for which not all genotypes were sequenced were omitted from this comparison.

The numbers of polymorphic nucleotide sites refer to variable position observed in final alignment.

Table S5. polymorphic nucleotide sites of *rp* gene

| <i>rp</i> (no. of strains)    | Polymorphic Nucleotide Sites |     |     |     |
|-------------------------------|------------------------------|-----|-----|-----|
|                               | 272                          | 273 | 274 | 597 |
| H <sub><i>rp</i></sub> 1(132) | A                            | C   | C   | G   |
| H <sub><i>rp</i></sub> 2(6)   | /                            | /   | /   | A   |

Additional mutations that were found in regions for which not all genotypes were sequenced were omitted from this comparison.

The numbers of polymorphic nucleotide sites refer to variable position observed in final alignment.

Table S6. polymorphic nucleotide sites of *fusA* gene

| <i>fusA</i> (no. of strains)    | Polymorphic Nucleotide Sites |     |     |
|---------------------------------|------------------------------|-----|-----|
|                                 | 85                           | 114 | 436 |
| H <sub><i>fusA</i></sub> 1(115) | G                            | C   | A   |
| H <sub><i>fusA</i></sub> 2(17)  | C                            | A   | •   |
| H <sub><i>fusA</i></sub> 3(1)   | •                            | •   | G   |

Additional mutations that were found in regions for which not all genotypes were sequenced were omitted from this comparison.

The numbers of polymorphic nucleotide sites refer to variable position observed in final alignment.

Table S7. polymorphic nucleotide sites of *secY* gene

| <i>secY</i> (no. of strains) | Polymorphic Nucleotide Sites |    |    |    |     |     |     |     |     |
|------------------------------|------------------------------|----|----|----|-----|-----|-----|-----|-----|
|                              | 18                           | 28 | 36 | 87 | 130 | 438 | 712 | 802 | 922 |
| H <sub>secY</sub> 1(111)     | T                            | A  | G  | G  | T   | T   | G   | A   | A   |
| H <sub>secY</sub> 2(17)      | •                            | •  | •  | •  | C   | •   | A   | G   | T   |
| H <sub>secY</sub> 3(1)       | •                            | G  | •  | •  | •   | •   | •   | •   | •   |
| H <sub>secY</sub> 4(1)       | •                            | •  | •  | •  | •   | A   | •   | •   | •   |
| H <sub>secY</sub> 5(2)       | G                            | •  | •  | •  | •   | •   | •   | •   | •   |
| H <sub>secY</sub> 6(1)       | •                            | •  | •  | C  | C   | •   | A   | G   | T   |
| H <sub>secY</sub> 7(1)       | •                            | •  | C  | •  | •   | •   | •   | •   | •   |

Additional mutations that were found in regions for which not all genotypes were sequenced were omitted from this comparison.

The numbers of polymorphic nucleotide sites refer to variable position observed in final alignment.

Table S8. polymorphic nucleotide sites of *tuf* gene

| <i>tuf</i> (no. of strains) | Polymorphic Nucleotide Sites |     |     |     |
|-----------------------------|------------------------------|-----|-----|-----|
|                             | 183                          | 421 | 528 | 763 |
| H <sub>tuf</sub> 1(114)     | T                            | A   | A   | G   |
| H <sub>tuf</sub> 2(16)      | •                            | G   | •   | •   |
| H <sub>tuf</sub> 3(1)       | •                            | G   | C   | •   |
| H <sub>tuf</sub> 4(1)       | •                            | •   | •   | C   |
| H <sub>tuf</sub> 5(1)       | G                            | •   | •   | •   |

Additional mutations that were found in regions for which not all genotypes were sequenced were omitted from this comparison.

The numbers of polymorphic nucleotide sites refer to variable position observed in final alignment.

Table S9. polymorphic nucleotide sites of *secA* gene

| <i>secA</i> (no. of strains) | Polymorphic Nucleotide Sites |     |     |     |     |
|------------------------------|------------------------------|-----|-----|-----|-----|
|                              | 38                           | 113 | 222 | 405 | 570 |
| H <sub>secA</sub> 1(113)     | C                            | A   | G   | T   | G   |
| H <sub>secA</sub> 2(17)      | •                            | C   | •   | A   | A   |
| H <sub>secA</sub> 3(1)       | •                            | •   | T   | •   | •   |
| H <sub>secA</sub> 4(1)       | T                            | •   | •   | •   | •   |

Additional mutations that were found in regions for which not all genotypes were sequenced were omitted from this comparison.

The numbers of polymorphic nucleotide sites refer to variable position observed in final alignment.

Table S10. polymorphic nucleotide sites of *dnaK* gene

| <i>dnaK</i> (no. of strains) | Polymorphic Nucleotide Sites |     |     |     |     |     |     |     |     |     |     |
|------------------------------|------------------------------|-----|-----|-----|-----|-----|-----|-----|-----|-----|-----|
|                              | 36                           | 164 | 195 | 263 | 477 | 509 | 710 | 962 | 964 | 965 | 974 |
| H <sub>dnaK</sub> 1(110)     | G                            | T   | C   | C   | T   | A   | C   | A   | A   | T   | T   |
| H <sub>dnaK</sub> 2(15)      | A                            | C   | T   | T   | C   | C   | •   | •   | •   | A   | •   |
| H <sub>dnaK</sub> 3(1)       | •                            | •   | •   | •   | •   | •   | •   | G   | •   | •   | •   |

|                        |   |   |   |   |   |   |   |   |   |   |   |   |
|------------------------|---|---|---|---|---|---|---|---|---|---|---|---|
| H <sub>dnaK</sub> 4(1) | • | • | • | • | • | • | • | • | • | • | • | C |
| H <sub>dnaK</sub> 5(1) | • | • | • | • | • | • | • | • | • | G | • | • |
| H <sub>dnaK</sub> 6(1) | A | C | T | T | C | C | • | • | • | • | A | C |
| H <sub>dnaK</sub> 7(1) | • | • | • | • | • | • | G | • | • | • | • | • |

Additional mutations that were found in regions for which not all genotypes were sequenced were omitted from this comparison.

The numbers of polymorphic nucleotide sites refer to variable position observed in final alignment.

Table S11. polymorphic nucleotide sites of *rpoB* gene

| <i>rpoB</i> (no. of strains) | Polymorphic Nucleotide Sites |    |    |    |     |     |     |     |     |     |     |     |     |     |
|------------------------------|------------------------------|----|----|----|-----|-----|-----|-----|-----|-----|-----|-----|-----|-----|
|                              | 9                            | 59 | 78 | 79 | 242 | 389 | 432 | 527 | 534 | 672 | 706 | 753 | 877 | 922 |
| H <sub>rpoB</sub> 1(107)     | A                            | T  | C  | C  | T   | G   | T   | A   | C   | G   | C   | G   | C   | A   |
| H <sub>rpoB</sub> 2(1)       | •                            | •  | •  | •  | •   | •   | •   | •   | •   | •   | •   | A   | •   | •   |
| H <sub>rpoB</sub> 3(9)       | •                            | G  | A  | •  | •   | •   | C   | G   | T   | •   | T   | A   | •   | •   |
| H <sub>rpoB</sub> 4(1)       | •                            | G  | •  | •  | A   | •   | C   | G   | T   | •   | T   | A   | A   | •   |
| H <sub>rpoB</sub> 5(2)       | •                            | G  | •  | •  | •   | •   | C   | G   | T   | •   | T   | A   | A   | •   |
| H <sub>rpoB</sub> 6(2)       | G                            | •  | •  | •  | •   | •   | •   | •   | •   | •   | •   | •   | •   | •   |
| H <sub>rpoB</sub> 7(1)       | •                            | •  | •  | •  | •   | •   | •   | •   | •   | •   | •   | •   | •   | G   |
| H <sub>rpoB</sub> 8(1)       | •                            | G  | A  | •  | •   | •   | C   | G   | T   | C   | T   | A   | •   | •   |
| H <sub>rpoB</sub> 9(1)       | •                            | •  | •  | •  | •   | T   | •   | •   | •   | •   | •   | •   | •   | •   |
| H <sub>rpoB</sub> 10(1)      | •                            | G  | A  | A  | •   | •   | C   | G   | T   | •   | T   | A   | •   | •   |
| H <sub>rpoB</sub> 11(1)      | •                            | G  | •  | •  | •   | •   | C   | G   | T   | •   | T   | A   | •   | •   |

Additional mutations that were found in regions for which not all genotypes were sequenced were omitted from this comparison.

The numbers of polymorphic nucleotide sites refer to variable position observed in final alignment.

Table S12. polymorphic nucleotide sites of *pyrG* gene

| <i>pyrG</i> (no. of strains)   | Polymorphic Nucleotide Sites |    |     |     |     |     |     |     |     |
|--------------------------------|------------------------------|----|-----|-----|-----|-----|-----|-----|-----|
|                                | 39                           | 67 | 222 | 426 | 499 | 554 | 582 | 696 | 769 |
| H <sub><i>pyrG</i></sub> 1(83) | A                            | A  | C   | C   | C   | C   | C   | C   | G   |
| H <sub><i>pyrG</i></sub> 2(1)  | •                            | •  | •   | •   | •   | T   | •   | •   | •   |
| H <sub><i>pyrG</i></sub> 3(1)  | •                            | •  | •   | •   | •   | •   | •   | •   | A   |
| H <sub><i>pyrG</i></sub> 4(2)  | •                            | G  | •   | •   | •   | •   | •   | •   | •   |
| H <sub><i>pyrG</i></sub> 5(1)  | •                            | •  | •   | •   | •   | •   | T   | •   | •   |
| H <sub><i>pyrG</i></sub> 6(1)  | C                            | •  | •   | •   | •   | •   | •   | •   | •   |
| H <sub><i>pyrG</i></sub> 7(11) | •                            | •  | T   | T   | •   | •   | •   | A   | A   |
| H <sub><i>pyrG</i></sub> 8(3)  | •                            | •  | •   | T   | •   | •   | •   | A   | A   |
| H <sub><i>pyrG</i></sub> 9(1)  | •                            | •  | •   | •   | •   | •   | •   | A   | A   |
| H <sub><i>pyrG</i></sub> 10(1) | •                            | •  | •   | •   | A   | •   | •   | •   | •   |

Additional mutations that were found in regions for which not all genotypes were sequenced were omitted from this comparison.

The numbers of polymorphic nucleotide sites refer to variable position observed in final alignment.

Table S13. polymorphic nucleotide sites of *gyrB* gene

| <i>gyrB</i> (no. of strains) | Polymorphic Nucleotide Sites |    |     |     |     |     |     |     |     |      |
|------------------------------|------------------------------|----|-----|-----|-----|-----|-----|-----|-----|------|
|                              | 37                           | 86 | 168 | 269 | 285 | 390 | 464 | 483 | 675 | 1103 |
| H <sub>gyrB</sub> 1(74)      | T                            | C  | C   | A   | A   | T   | G   | C   | T   | A    |
| H <sub>gyrB</sub> 2(9)       | •                            | A  | A   | •   | G   | C   | A   | T   | C   | •    |
| H <sub>gyrB</sub> 3(1)       | •                            | •  | •   | •   | •   | •   | •   | •   | •   | G    |
| H <sub>gyrB</sub> 4(1)       | A                            | •  | •   | •   | •   | •   | •   | •   | •   | •    |
| H <sub>gyrB</sub> 5(1)       | •                            | A  | A   | T   | G   | C   | A   | T   | C   | •    |

Additional mutations that were found in regions for which not all genotypes were sequenced were omitted from this comparison.

The numbers of polymorphic nucleotide sites refer to variable position observed in final alignment.

Table S14. polymorphic nucleotide sites of *ipt* gene

| <i>ipt</i> (no. of strains) | Polymorphic Nucleotide Sites |     |     |     |
|-----------------------------|------------------------------|-----|-----|-----|
|                             | 102                          | 158 | 322 | 734 |
| H <sub>ipt</sub> 1(69)      | G                            | C   | C   | C   |
| H <sub>ipt</sub> 2(2)       | •                            | •   | •   | T   |
| H <sub>ipt</sub> 3(4)       | A                            | •   | •   | •   |
| H <sub>ipt</sub> 4(7)       | •                            | T   | •   | •   |
| H <sub>ipt</sub> 5(1)       | •                            | •   | A   | •   |

Additional mutations that were found in regions for which not all genotypes were sequenced were omitted from this comparison.

The numbers of polymorphic nucleotide sites refer to variable position observed in final alignment.

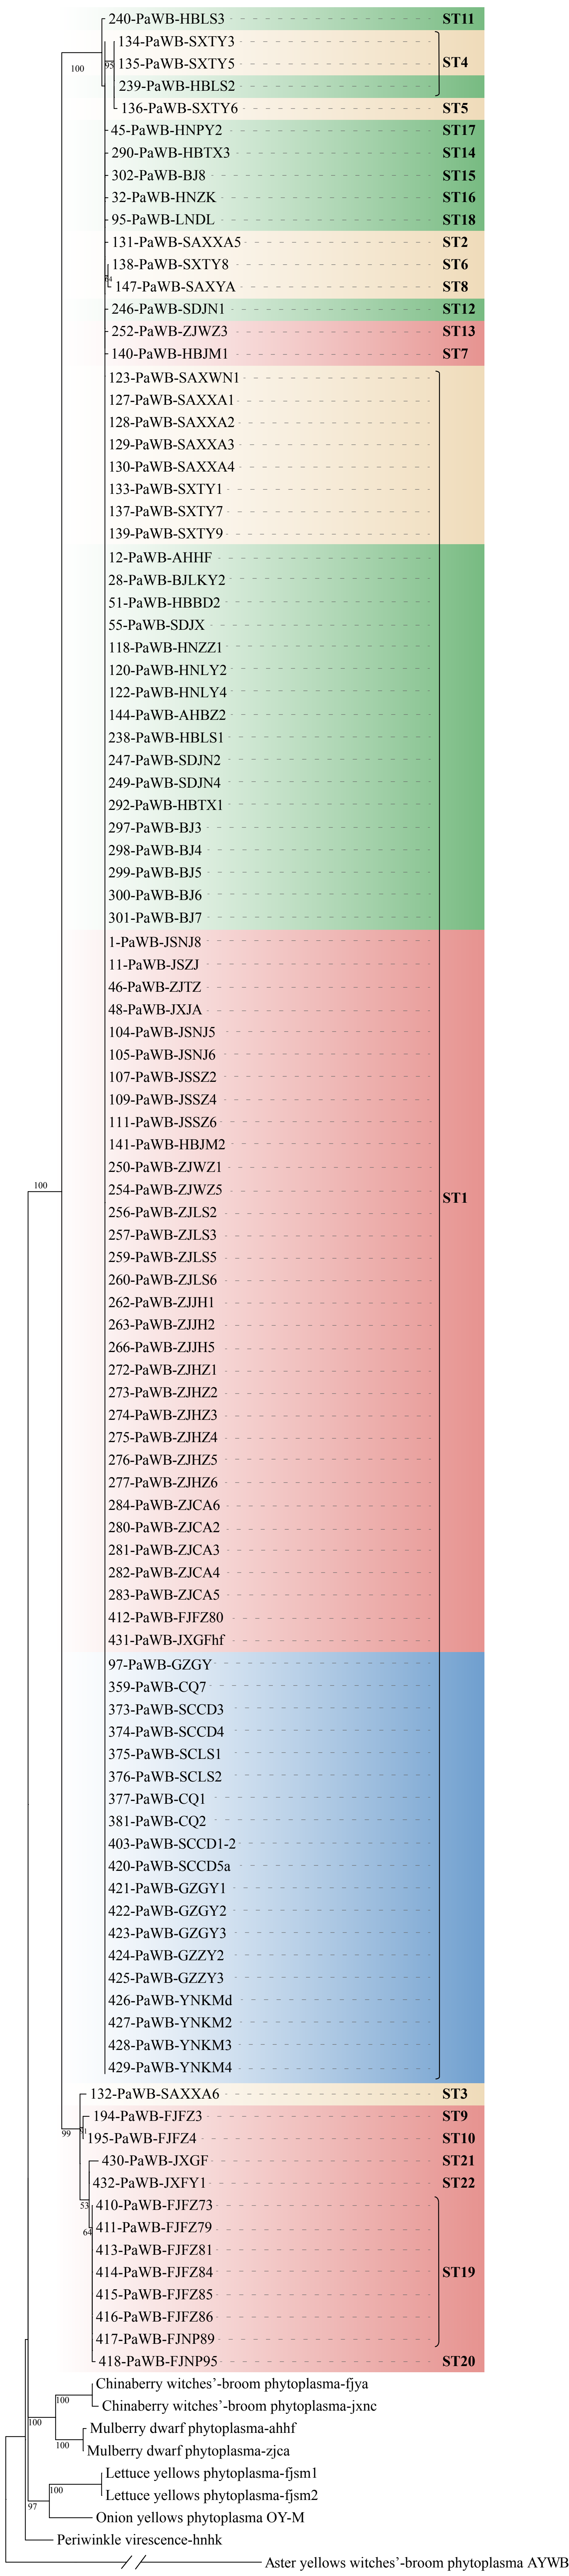

Figure S1. Phylogenetic tree constructed based on the concatenate sequences of the 105 PaWB phytoplasma strains and 6 kinds of phytoplasma reference strains employing the maximum-likelihood method.

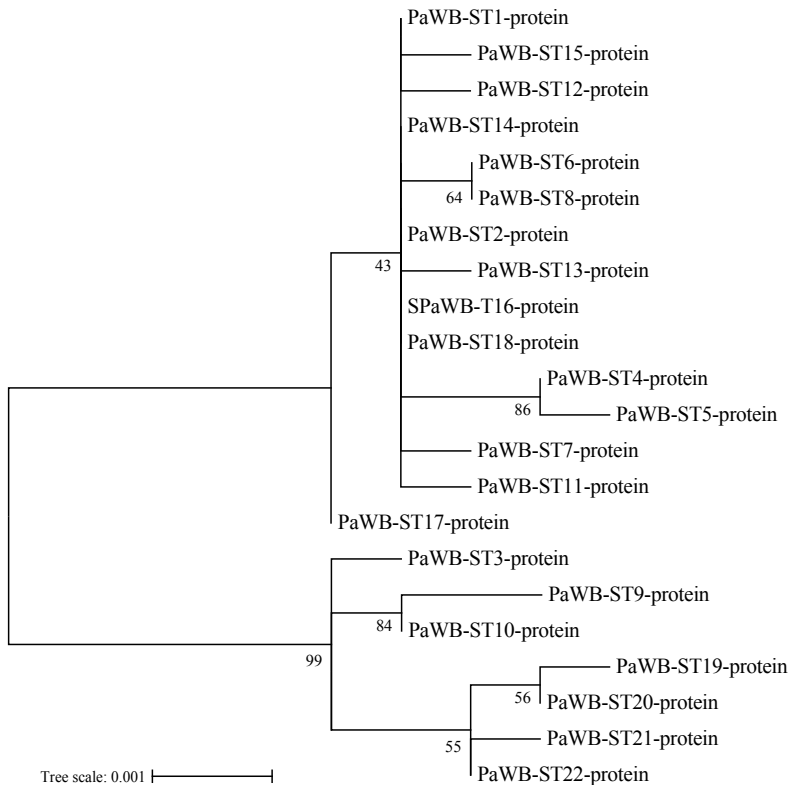

Figure S2. Maximum-likelihood phylogenetic tree for the 22 STs of *PaWB* phytoplasmas based on the concatenated sequences of six proteins (except ribosomal protein). The scale bar length represents inferred character-state changes under the best-fitting LG+G+I model.

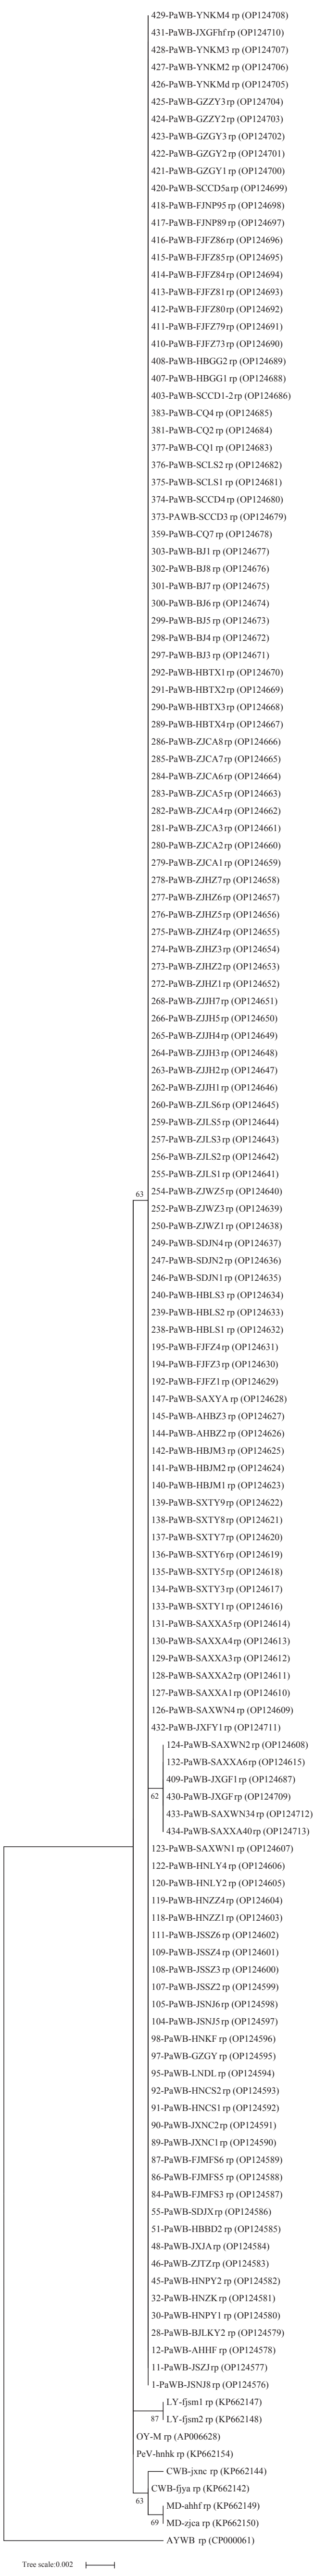

Figure S3. Phylogenetic tree constructed based on the *rp* gene of the PaWB phytoplasma strains and 6 kinds of phytoplasma reference strains employing the maximum-likelihood method.



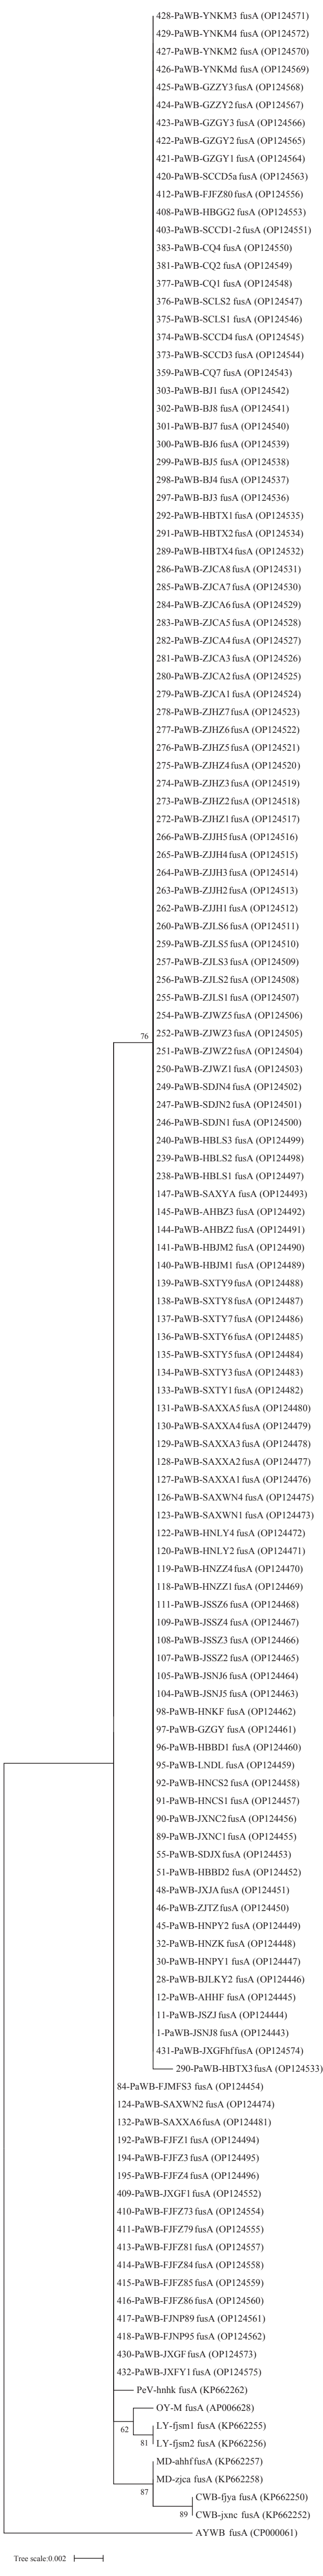

Figure S4. Phylogenetic tree constructed based on the *fusA* gene of the PaWB phytoplasma strains and 6 kinds of phytoplasma reference strains employing the maximum-likelihood method.

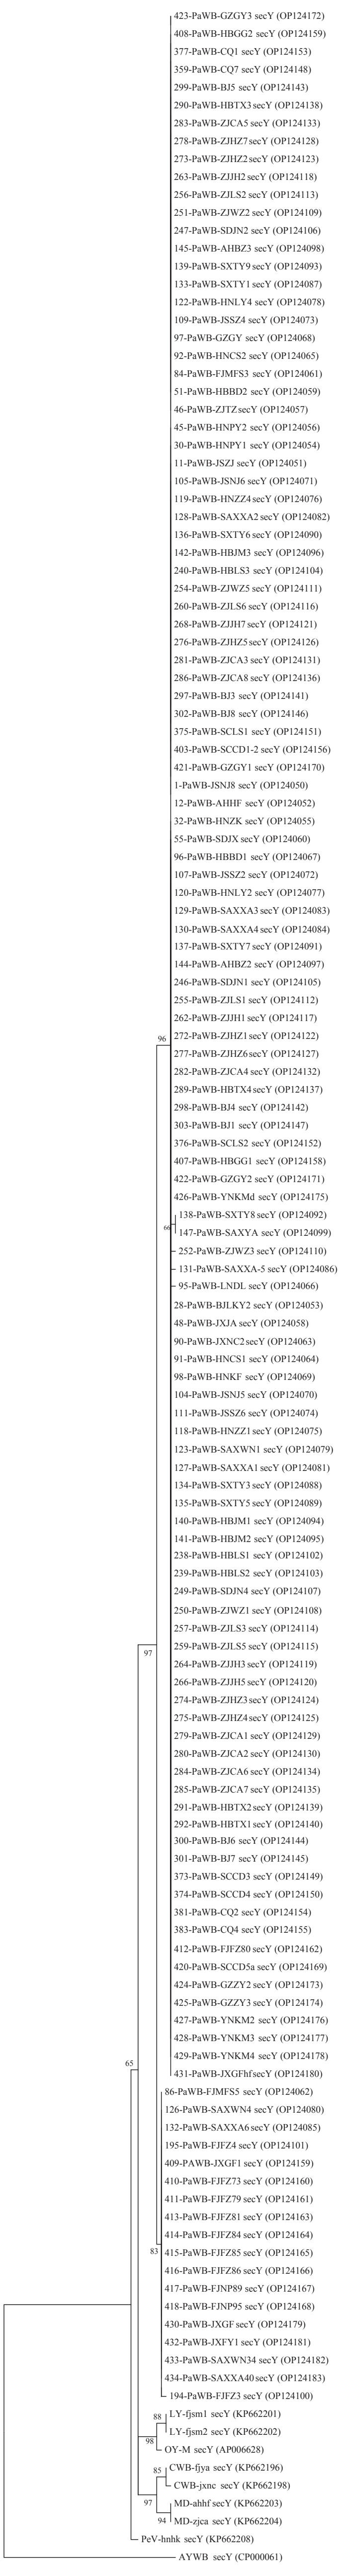

Figure S5. Phylogenetic tree constructed based on the *secY* gene of the PaWB phytoplasma strains and 6 kinds of phytoplasma reference strains employing the maximum-likelihood method.

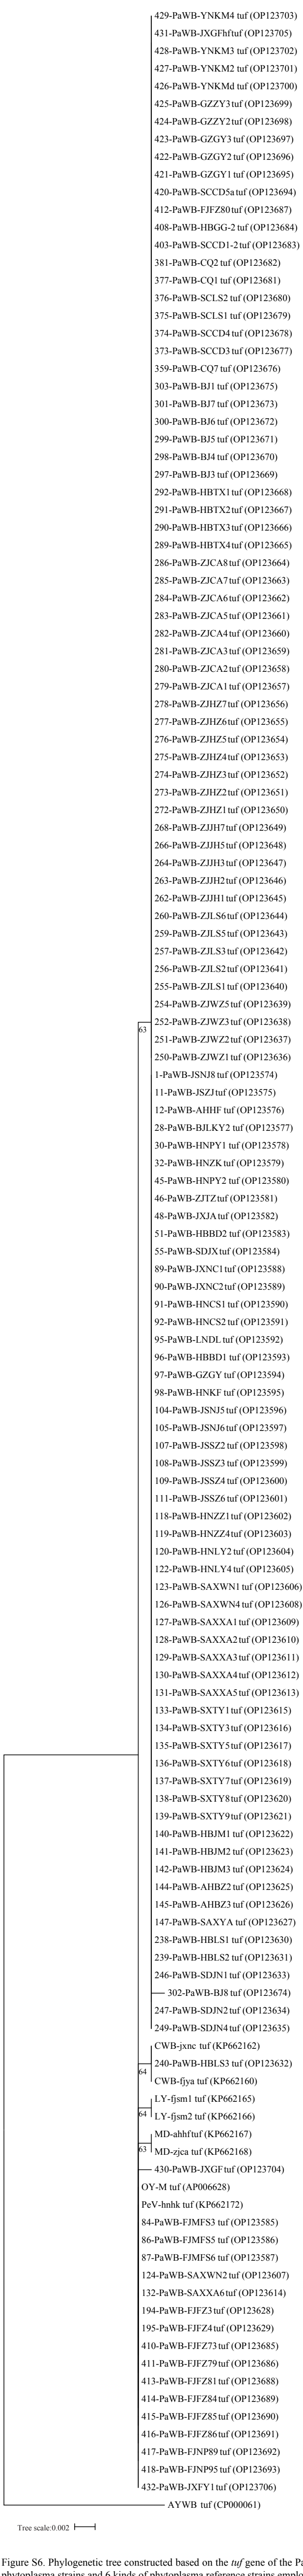

Figure S6. Phylogenetic tree constructed based on the *tuf* gene of the PaWB phytoplasmal strains and 6 kinds of phytoplasmal reference strains employing the maximum-likelihood method.

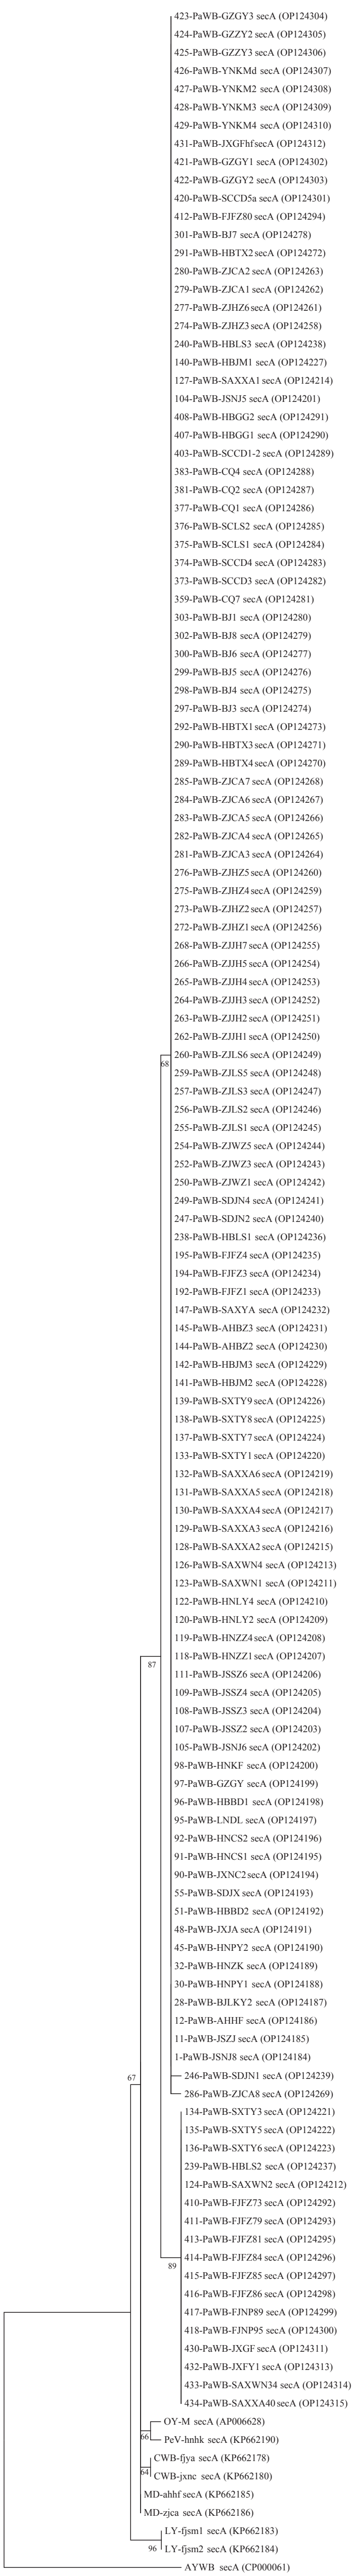

Figure S7. Phylogenetic tree constructed based on the *secA* gene of the PaWB phytoplasma strains and 6 kinds of phytoplasma reference strains employing the maximum-likelihood method.



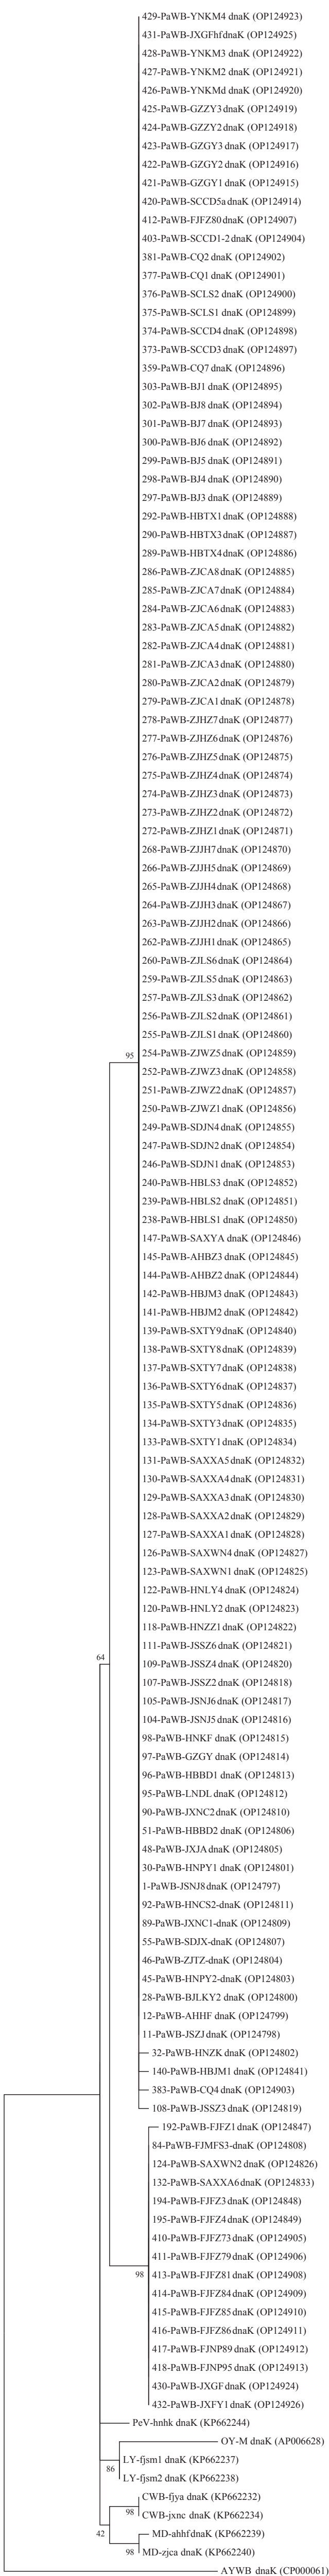

Figure S8. Phylogenetic tree constructed based on the *dnaK* gene of the PaWB phytoplasmal strains and 6 kinds of phytoplasmal reference strains employing the maximum-likelihood method.

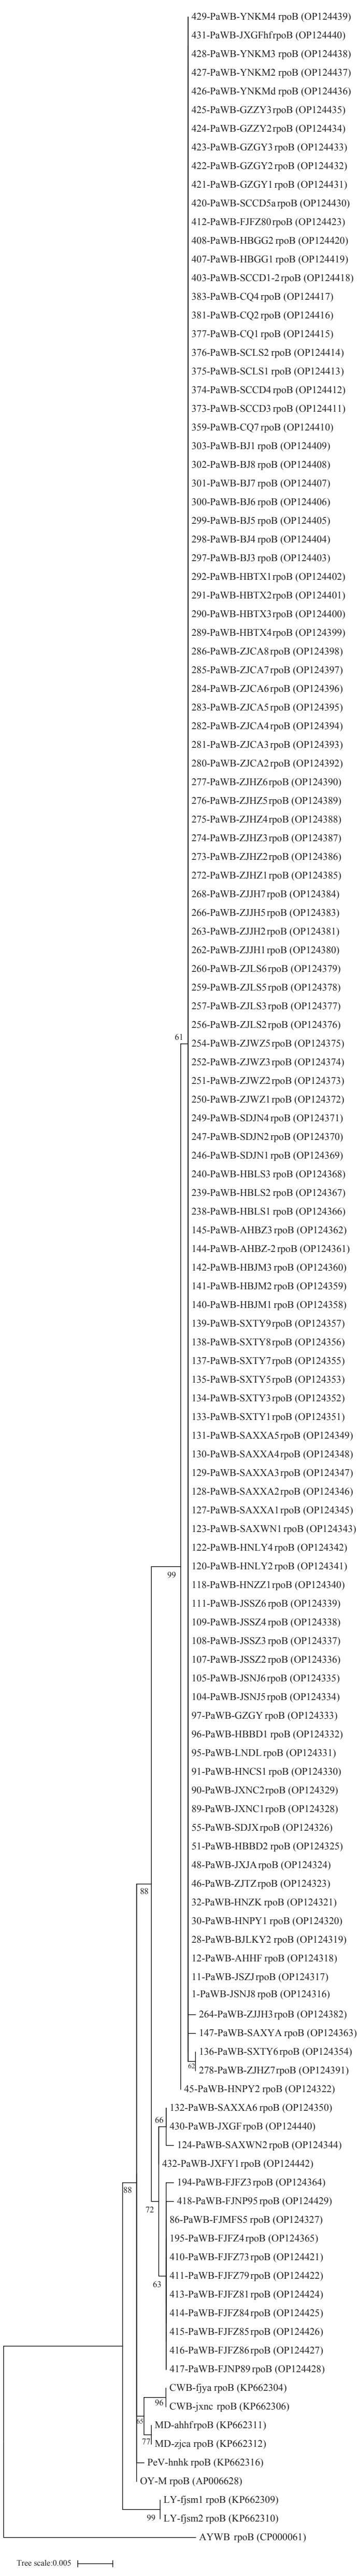

Figure S9. Phylogenetic tree constructed based on the *rpoB* gene of the PaWB phytoplasma strains and 6 kinds of phytoplasma reference strains employing the maximum-likelihood method.

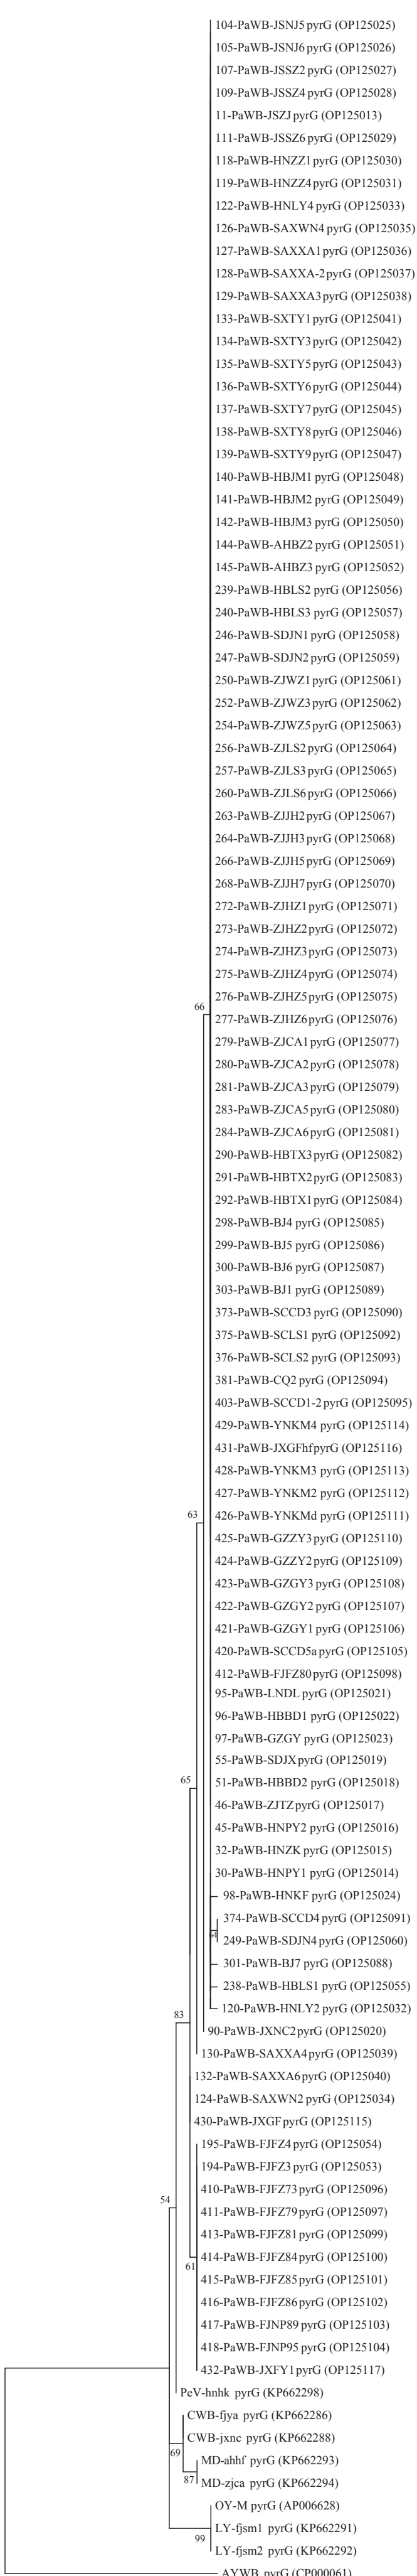

Figure S10. Phylogenetic tree constructed based on the *pyrG* gene of the PaWB phytoplasma strains and 6 kinds of phytoplasma reference strains employing the maximum-likelihood method.

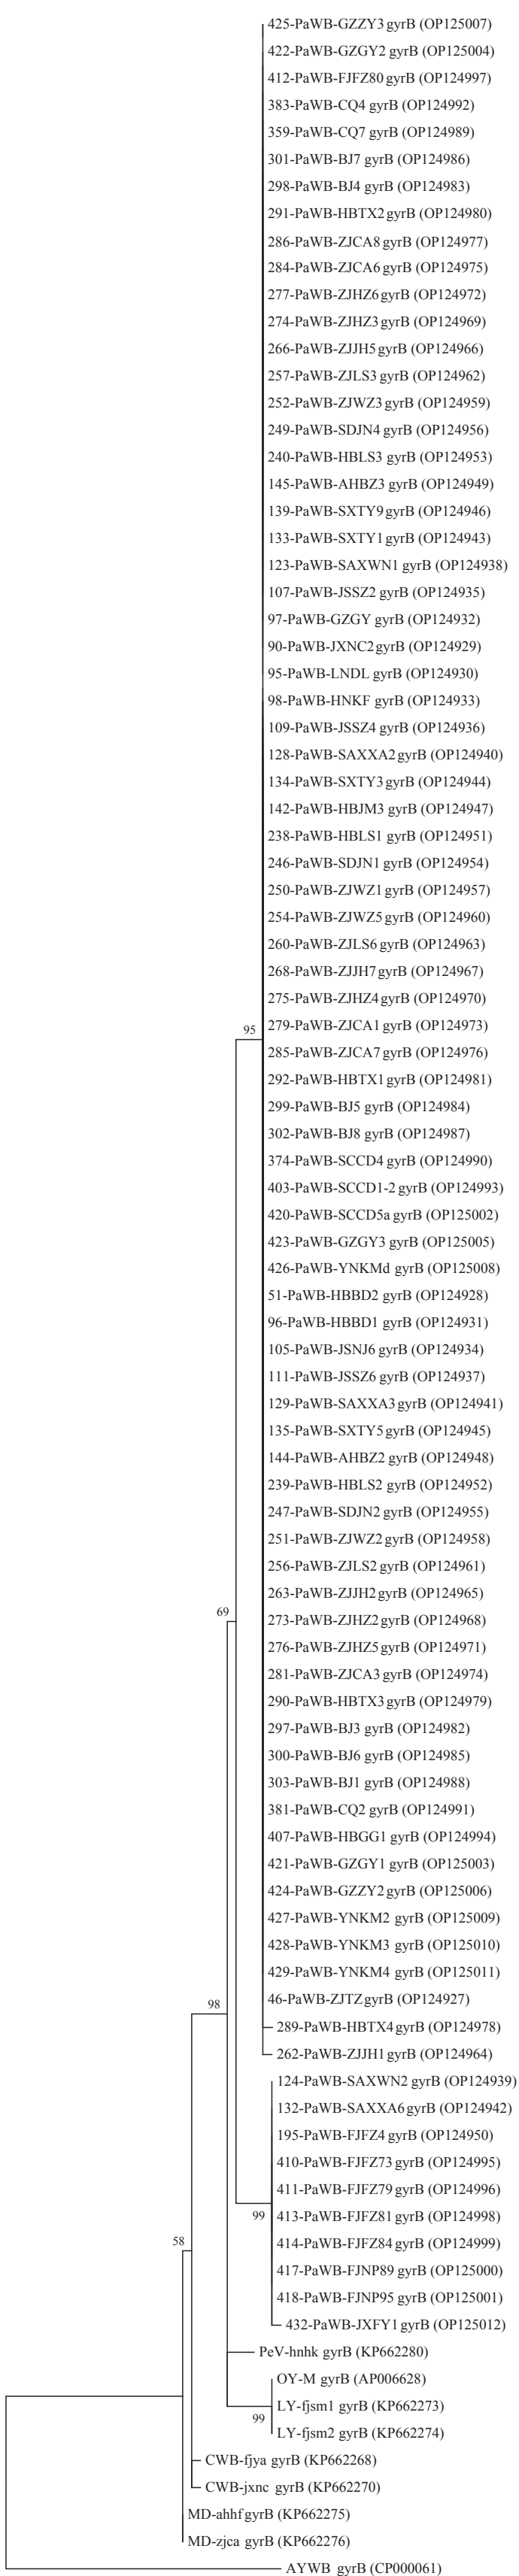

Figure S11. Phylogenetic tree constructed based on the *gyrB* gene of the PaWB phytoplasma strains and 6 kinds of phytoplasma reference strains employing the maximum-likelihood method.



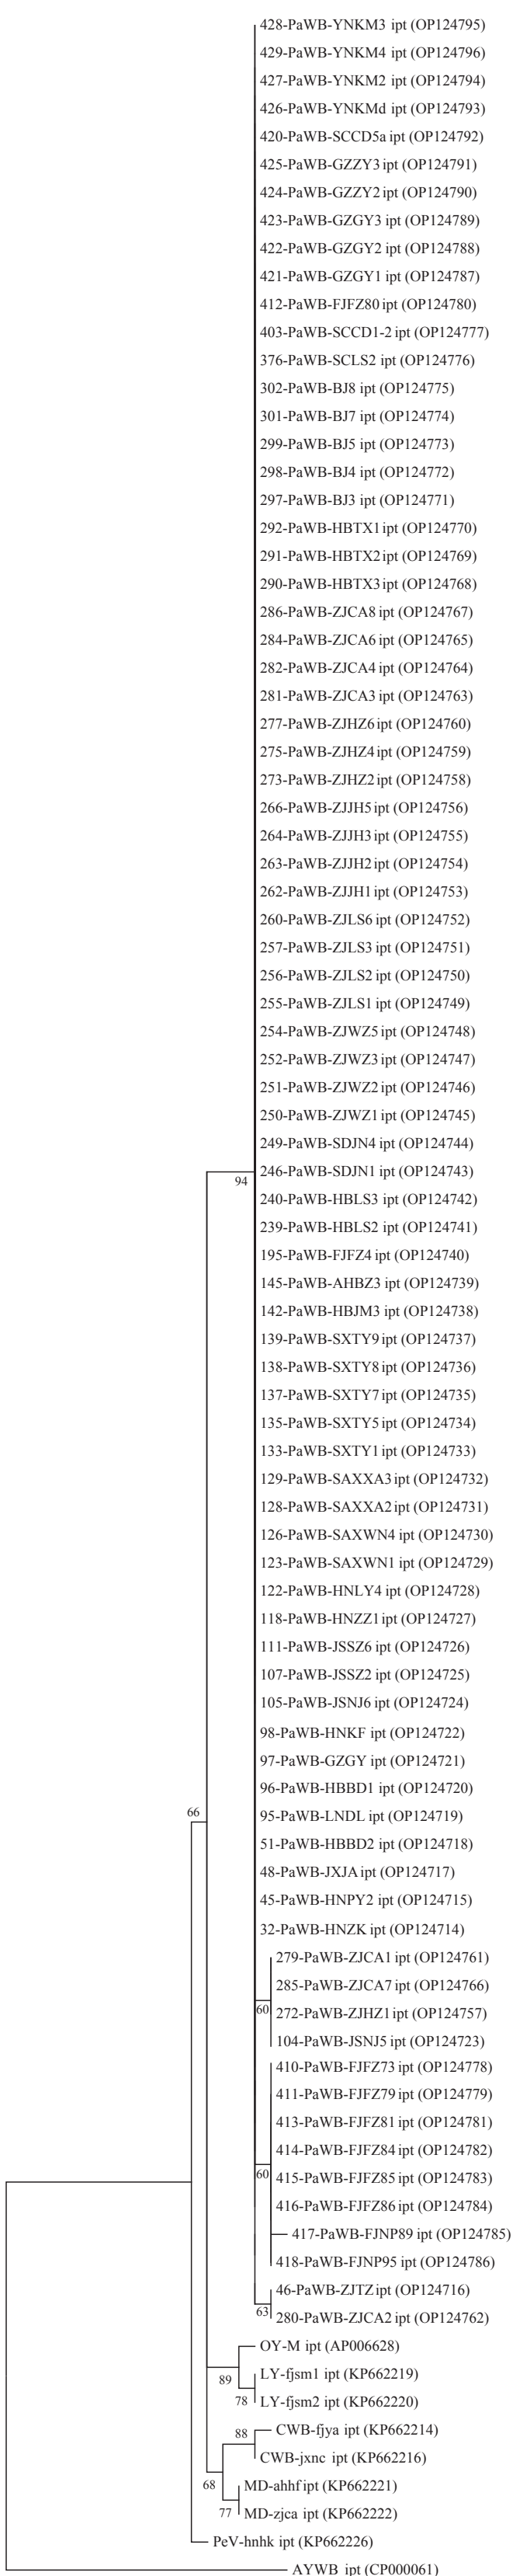

Figure S12. Phylogenetic tree constructed based on the *ipt* gene of the PaWB phytoplasma strains and 6 kinds of phytoplasma reference strains employing the maximum-likelihood method.
